# Supplementary material for: Regional Delivery of Chimeric Antigen Receptor–Engineered T Cells Effectively Targets HER2+ Breast Cancer Metastasis to the Brain
Source: Oxford University Press journal article supplement (doi:10.1158/1078-0432.ccr-17-2041), 2017-10-23
Supplement: 10780432ccr172041-sup-186400_2_supp_4309961_mxm3tg.docx [file 10780432ccr172041-sup-186400_2_supp_4309961_mxm3tg.docx]

**Title: Regional Delivery of Chimeric Antigen Receptor-Engineered T Cells Effectively Targets HER2+ Breast Cancer Metastasis to the Brain**

**Authors:** Saul J. Priceman1,2, Dileshni Tilakawardane1,2, Brook Jeang1,2, John P. Murad1,2, Anthony K. Park1,2, Wen-Chung Chang1,2, Julie Ostberg1,2, Josh Neman3, Rahul Jandial4, Jana Portnow5, Stephen J. Forman1,2,*, Christine E. Brown1,2,*

**Figure S1: HER2 expression in BBM1 tumors.** (a) Representative histology of HER2 expression in BBM1 tumors engrafted in mouse brain. N = normal brain, T = BBM1 tumor.

**Figure S2: Intraventricular HER2-BBζ CAR T cell therapy is effective against BBM1 tumors.** (a-c) BBM1 tumor-bearing mice were treated 3, 8, or 14 days post-tumor injection with i.c.v. delivered Mock or HER2-BBζ CAR T cells (0.5x106 cells), or left untreated (Tumor only). Quantification of flux signal from individual mice in each group at indicated time points post tumor injection. n = 4 per group. (d-f) Kaplan-Meier survival for Tumor only, Mock or HER2-BBζ CAR T cell treated BBM1-tumor bearing mice.

**Figure S3: Intraventricular HER2-BBζ CAR T cell therapy is effective against HER2+ BT474 tumors, but not HER2- MDA-MB-468 tumors.** (a) BT474-ffluc-eGFP tumor-bearing mice (0.15x106 cells) were treated 8 days post-tumor injection with i.c.v. delivered Mock or HER2-BBζ CAR T cells (0.5x106 cells). Quantification of flux signal from individual mice in each group at indicated time points post tumor injection. n = 4 per group. (b) Kaplan-Meier survival for BT474-tumor bearing mice treated with Mock or HER2-BBζ CAR T cells. (c) MDA-MB-468-ffluc-eGFP tumor-bearing mice (0.2x106 cells) were treated 8 days post-tumor injection with i.c.v. delivered Mock or HER2-BBζ CAR T cells (0.5x106 cells), or left untreated (Tumor only). Quantification of flux signal from individual mice in each group at indicated time points post tumor injection. n = 4 per group. (d) Kaplan-Meier survival for Tumor only, Mock or HER2-BBζ CAR T cell treated MDA-MB-468-tumor bearing mice.

**Figure S4: CD4 and CD8 CAR T cell infiltrates in BBM1 tumors.** Representative histology of CD4 and CD8 expression in BBM1 tumors 1-week post i.c.v. HER2-BBζ CAR T cell infusion. Same tissue as in Figure 5 F.
